# Supplementary material for: Value and Limitations of Broad Brush Surveys Used in Community-Randomized Trials in Southern Africa
Source: PubMed Central journal article supplement (PMC6533803; doi:10.1177/1049732318809940), 2018-12-17
Supplement: QHR809940_Supplemental_Material_REV4.pdf [file QHR809940_Supplemental_Material_REV4.pdf]

**Supplemental Table. BBS Participant Types and Numbers and Structured Observations.**

| CRT                                    | Group Discussions       |              |       |                             |              |       |                   |             |       |                                                           | Structured Observations |               |                 |                               |                   |             |    |
|----------------------------------------|-------------------------|--------------|-------|-----------------------------|--------------|-------|-------------------|-------------|-------|-----------------------------------------------------------|-------------------------|---------------|-----------------|-------------------------------|-------------------|-------------|----|
|                                        | Local Health Committees |              |       | Stakeholders/Health Experts |              |       | Community Members |             |       | In-depth Interviews (IDs)/ Key Informant Interviews (KIs) |                         | Transect Walk | Health Facility | Gathering Places <sup>a</sup> | Exit/Entry Points | Night Walks |    |
|                                        | Groups (n)              | Participants |       | Groups (n)                  | Participants |       | Groups (n)        | Participant |       | Participant                                               |                         |               |                 |                               |                   |             |    |
|                                        |                         | Men          | Women |                             | Men          | Women |                   | Men         | Women | Men                                                       | Women                   |               |                 |                               |                   |             |    |
| ZAMSTAR                                |                         |              |       | 24                          |              |       |                   |             |       |                                                           |                         |               | 24              | 24                            | 120               | 24          | 24 |
| CODA                                   |                         |              |       | 16                          |              |       |                   |             |       |                                                           |                         |               | 16              | 16                            | 112               | 16          | 16 |
| BHOMA                                  | 16                      | 68           | 68    | 16                          | 144          | 144   | 62                | 205         | 273   | 34                                                        | 44                      |               | 16              | 16                            | 106               | 16          | 16 |
| PopART                                 | 16                      | 78           | 101   | 36 <sup>b</sup>             | 74           | 250   | 78                | 250         | 342   | 44                                                        | 51                      |               | 21              | 39 <sup>c</sup>               | 89                | 42          | 12 |
| P-ART-Y                                | 0                       | 0            | 0     | 0 <sup>d</sup>              | 0            | 0     | 0 <sup>e</sup>    | 0           | 0     | 0                                                         | 0                       |               | 30              | 30                            | 0 <sup>f</sup>    | 0           | 0  |
| Africa Health Research Institute (AHR) | 0                       | 0            | 0     | 5                           | 6            | 30    | 17                | 72          | 83    | 12                                                        | 27                      |               | 4               | 1                             | 11                | 2           | 2  |

Note. BBS = Broad Brush Survey; CRT = community-randomized trial; ZAMSTAR = Zambia South Africa TB and HIV Reduction; TB = tuberculosis; CODA = Contact Observations of Daily Activities; BHOMA = Better Health Outcome through Mentoring and Assessment; P-ART-Y = PopART for Youth.

<sup>a</sup>Gathering places included bars, funerals, mortuaries, graveyards, gathering places for younger and older men, gathering places younger and older women, hair salons, barbers, watering points, markets, churches, and pension pay-points.

<sup>b</sup>Includes participants identified as "HIV specialists" and "People living with HIV."

<sup>c</sup>Includes ART health facilities, antenatal care, and Medical Male Circumcision (MMC) services.

<sup>d</sup>Stakeholders were visited individually, and informal unstructured conversations were conducted.

<sup>e</sup>Informal conversations were conducted with numerous community members across South Africa and Zambia. However, exact numbers were not recorded.

<sup>f</sup>A number of informal observations were conducted during the transect walks.
